# Supplementary material for: Effects of Salt Stress on Physiological and Agronomic Traits of Rice Genotypes with Contrasting Salt Tolerance
Source: MDPI journal article supplement (doi:10.3390/plants13081157), 2024-04-22
Supplement: s1 [file s1]

Table S1. The ANOVA analysis of plant height and tiller number of rice genotypes under salt stress in 2021 and 2022.

| Variety | Plant height |      | Tiller number |      |
|---------|--------------|------|---------------|------|
|         | 2021         | 2022 | 2021          | 2022 |
| T       | ***          | ***  | ***           | ***  |
| V       | ***          | **   | **            | **   |
| T*V     | ns           | *    | *             | *    |

ns, not significant; \*, \*\*, \*\*\* significant at  $p < 0.05$ , 0.01 and 0.001.

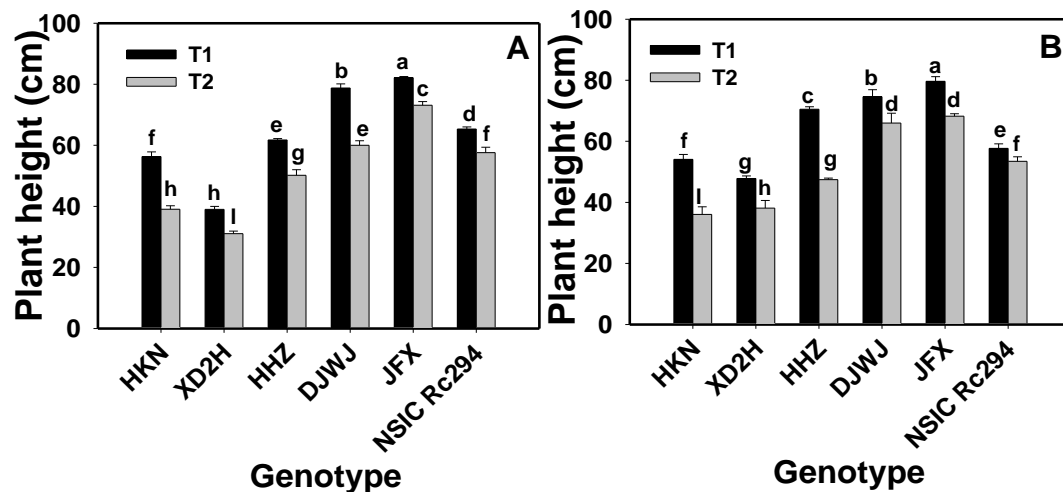

Figure S1. Effect of salt stress on plant height of different rice genotypes. T1: control, T2: salt treatment; Different lowercase letters indicate significant level of difference between genotypes under different treatments at  $p < 0.05$ . The plant height was measured with 10 repetitions plants in each replicate. A: 2021. B: 2022.

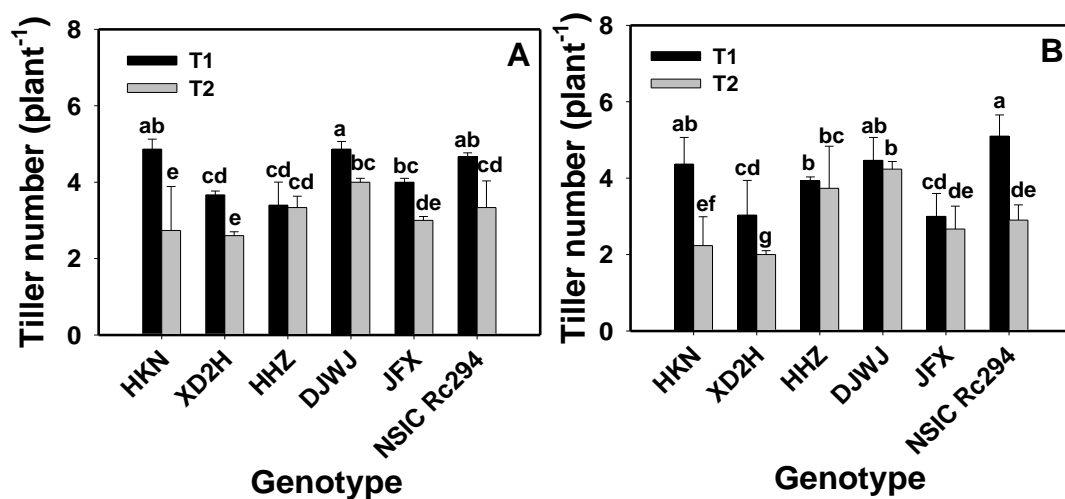

Figure S2. Effect of salinity stress on tiller number of different rice genotypes. T1: control, T2: salt treatment; Different lowercase letters indicate significant level of difference between genotypes under different treatments at  $p < 0.05$ . The tiller number was measured with 10 repetitions plants in each replicate. A: 2021. B: 2022.

Table S2. Effect of salt stress on fresh weight, dry weight and relative growth rate (RGR) of different rice genotypes in 2021 and 2022.

| Variety    | Treatment | Fresh weight<br>(g plant <sup>-1</sup> ) |         | Dry weight<br>(g plant <sup>-1</sup> ) |         | RGR<br>(g plant <sup>-1</sup> d <sup>-1</sup> ) |         |
|------------|-----------|------------------------------------------|---------|----------------------------------------|---------|-------------------------------------------------|---------|
|            |           | 2021                                     | 2022    | 2021                                   | 2022    | 2021                                            | 2022    |
| HKN        | T1        | 65.8 e                                   | 83.9 f  | 5.1 de                                 | 6.5 de  | 0.08 e                                          | 0.14 de |
|            | T2        | 32.5 h                                   | 30.9 k  | 3.1 e                                  | 2.6 g   | 0.04 f                                          | 0.07 f  |
| XD2H       | T1        | 39.2 g                                   | 53.9 i  | 7.8 bc                                 | 9.1 bcd | 0.13 d                                          | 0.19 bc |
|            | T2        | 25.9 i                                   | 46.0 j  | 3.3 e                                  | 2.9 fg  | 0.04 f                                          | 0.07 f  |
| HHZ        | T1        | 96.2 c                                   | 117.3 d | 9.2 bc                                 | 10.9 ab | 0.19 ab                                         | 0.20 bc |
|            | T2        | 49.6 f                                   | 69.9 g  | 7.1 cd                                 | 5.5 cde | 0.11 d                                          | 0.12 e  |
| DJWJ       | T1        | 165.9 a                                  | 179.5 a | 10.2 ab                                | 9.9 abc | 0.17 bc                                         | 0.21 ab |
|            | T2        | 97.5 c                                   | 94.8 e  | 8.7 bc                                 | 9.4 abc | 0.14 cd                                         | 0.20 b  |
| JFX        | T1        | 115.1 b                                  | 132.2 c | 9.4 bc                                 | 11.9 a  | 0.20 ab                                         | 0.20 b  |
|            | T2        | 71.2 d                                   | 59.4 h  | 7.7 bcd                                | 6.2 e   | 0.13 d                                          | 0.14 de |
| NSIC Rc294 | T1        | 166.6 a                                  | 147.1 b | 12.1 a                                 | 11.4 ab | 0.21 a                                          | 0.24 a  |
|            | T2        | 69.3 de                                  | 66.1 g  | 8.3 bc                                 | 7.6 cde | 0.14 d                                          | 0.16 cd |
| LSD(0.05)  |           | 13.67                                    | 4.21    | 3.42                                   | 2.69    | 0.03                                            | 0.03    |
| T          |           | ***                                      | ***     | ***                                    | ***     | ***                                             | ***     |
| V          |           | ***                                      | ***     | ***                                    | ***     | ***                                             | ***     |
| T*V        |           | ns                                       | **      | ns                                     | ns      | ***                                             | ns      |

T1: control, T2: salt treatment; Different lowercase letters indicate significant level of difference between genotypes under different treatments at  $p < 0.05$ . ns, not significant; \*, \*\* and \*\*\* in the table indicate  $p < 0.05$ , 0.01 and 0.001, respectively. The fresh weight, dry weight and RGR were measured with 10 repetitions plants in each replicate.

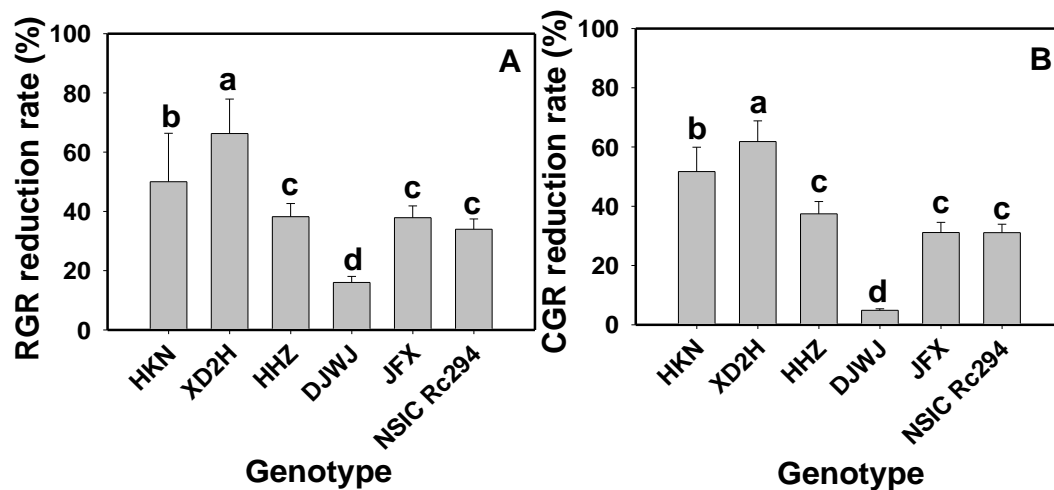

Figure S3. Effect of salt stress on relative growth rate (RGR) of different rice genotypes. Different lowercase letters indicate significant level of difference at  $p < 0.05$ . The RGR was measured with 10 repetitions plants in each replicate. A: 2021. B: 2022.

Table S3. The ANOVA analysis of MDA, soluble protein (SP) and Proline (Pro) of rice genotypes under salt stress in 2021 and 2022.

| Variety | MDA  |      | SP   |      | Pro  |      |
|---------|------|------|------|------|------|------|
|         | 2021 | 2022 | 2021 | 2022 | 2021 | 2022 |
| T       | ***  | ***  | ***  | ***  | ***  | ***  |
| V       | ***  | **   | ***  | ***  | ***  | ***  |
| T*V     | **   | *    | *    | *    | **   | **   |

\*, \*\*, \*\*\* significant at  $p < 0.05$ , 0.01 and 0.001.

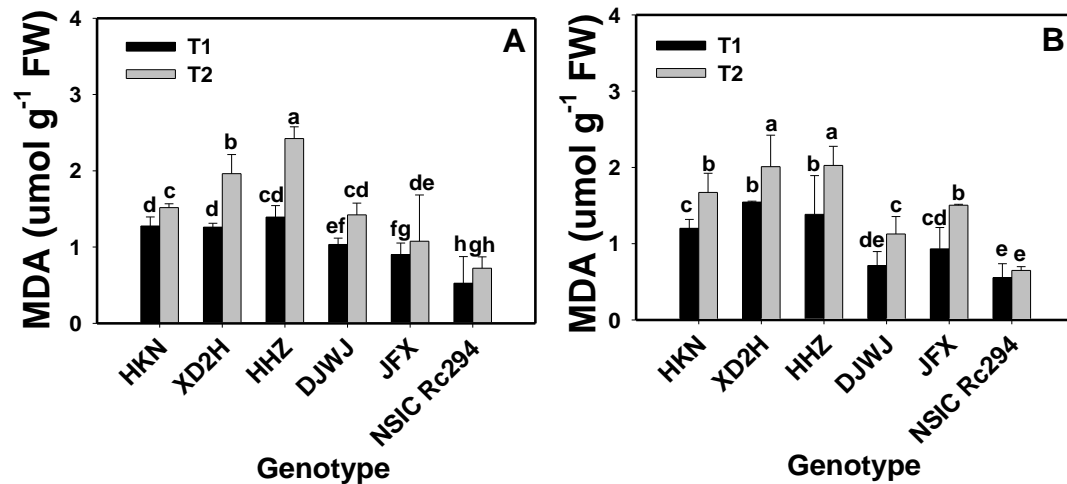

Figure S4. Effect of salt stress on MDA content of different rice genotypes. T1: control, T2: salt treatment; Different lowercase letters indicate significant level of difference between genotypes under different treatment ( $p < 0.05$ ). The MDA was measured with frozen leaves by 5 repetitions in each replicate. A: 2021. B: 2022.

Table S4. The ANOVA analysis of SOD, CAT and POD of rice genotypes under salt stress in 2021 and 2022.

| Variety | SOD  |      | CAT  |      | POD  |      |
|---------|------|------|------|------|------|------|
|         | 2021 | 2022 | 2021 | 2022 | 2021 | 2022 |
| T       | ***  | ***  | ***  | ***  | ***  | ***  |
| V       | ***  | **   | ns   | ns   | ns   | ns   |
| T*V     | ns   | *    | ns   | ns   | ns   | ns   |

ns, not significant; \*, \*\*, \*\*\* significant at  $p < 0.05$ , 0.01 and 0.001.

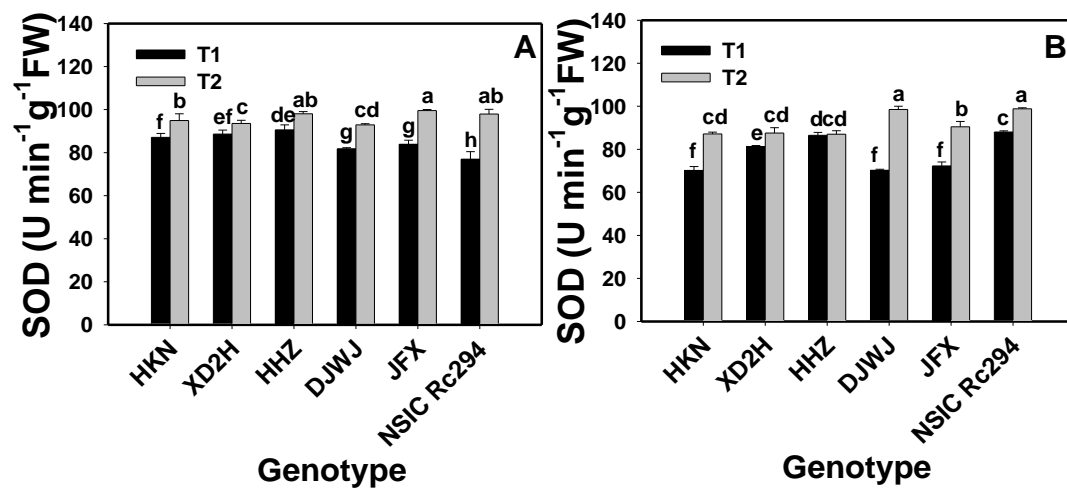

Figure S5. Effect of salt stress on SOD activity of different rice genotypes. T1: control, T2: salt treatment; Different lowercase letters indicate significant differences between genotypes under different treatment ( $p < 0.05$ ). The SOD was measured with frozen leaves by 5 repetitions in each replicate. A: 2021. B: 2022.

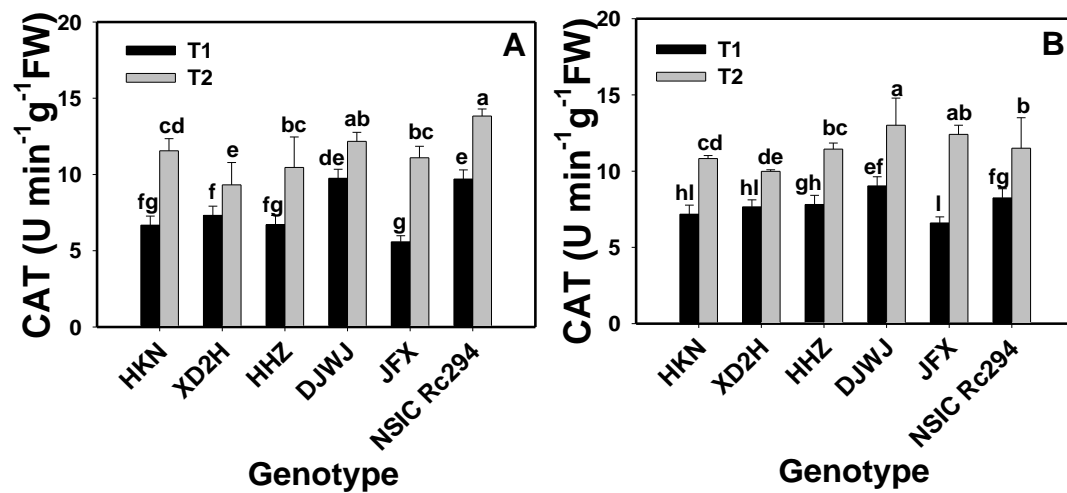

Figure S6. Effect of salt stress on CAT activity of different rice genotypes. T1: control, T2: salt treatment; Different lowercase letters indicate significant level of difference between genotypes under different treatment ( $p < 0.05$ ). The CAT was measured with frozen leaves by 5 repetitions in each replicate. A: 2021. B: 2022.

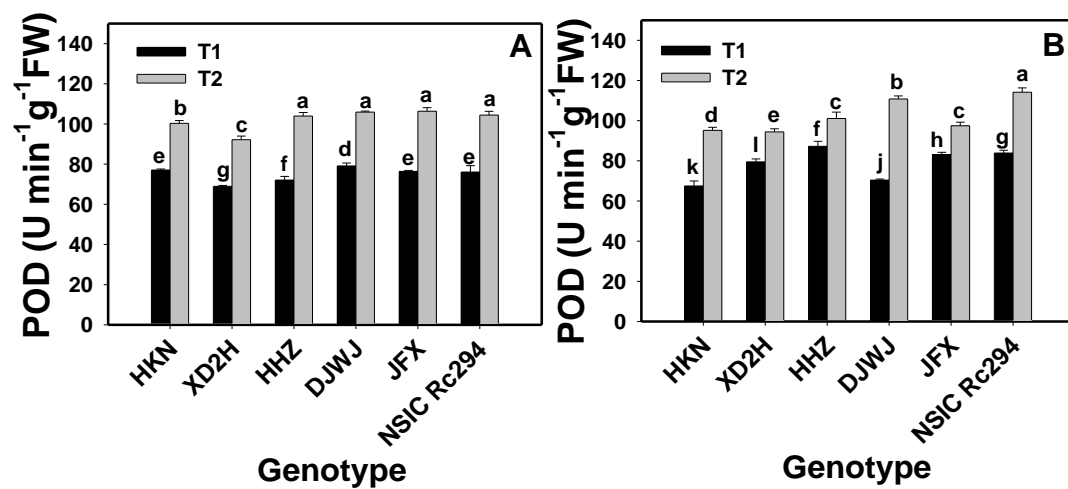

Figure S7. Effect of salt stress on POD activity of different rice genotypes. T1: control, T2: salt treatment; Different lowercase letters indicate significant level of difference between genotypes under different treatment (*p* < 0.05). The POD was measured with frozen leaves by 5 repetitions in each replicate. A: 2021. B: 2022.

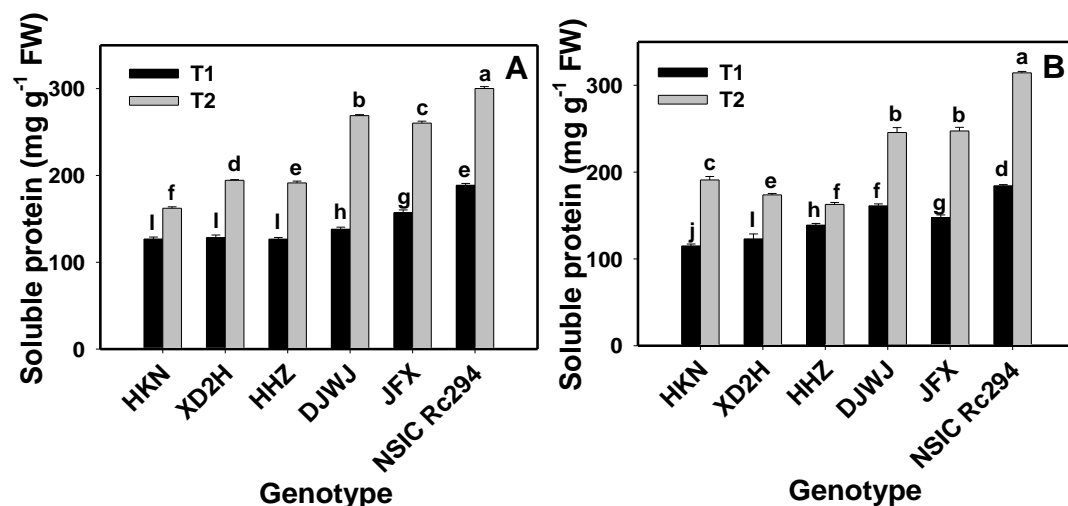

Figure S8. Effect of salt stress on soluble protein of different rice genotypes. T1: control, T2: salt treatment; Different lowercase letters indicate significant level of difference between genotypes under different treatment (*p* < 0.05). The soluble protein was measured with frozen leaves by 5 repetitions in each replicate. A: 2021. B: 2022.

Table S5. Effect of salt stress on grain yield and yield components of different rice genotypes in 2021.

| Variety   | Treatment | Yield<br>(g pot <sup>-1</sup> ) | panicles<br>(pot <sup>-1</sup> ) | Spikelets<br>per panicle | Total spikelets<br>(10 <sup>3</sup> pot <sup>-1</sup> ) | Grain<br>filling (%) | 1000-grain<br>weight (g) |
|-----------|-----------|---------------------------------|----------------------------------|--------------------------|---------------------------------------------------------|----------------------|--------------------------|
| HKN       | T1        | 151.5a                          | 51.6e                            | 180.1a                   | 9.31a                                                   | 67.46bcd             | 23.1a                    |
|           | T2        | 54.8f                           | 39.8g                            | 113.7b                   | 4.42cd                                                  | 56.04e               | 19.2cde                  |
| XD2H      | T1        | 84.2e                           | 51.7e                            | 97.5bc                   | 4.94cd                                                  | 74.33ab              | 20.3bcd                  |
|           | T2        | 34.1g                           | 43.1f                            | 56.7f                    | 2.31e                                                   | 63.62cde             | 19.5bcd                  |
| HHZ       | T1        | 77.8e                           | 76.4a                            | 75.3d                    | 5.67cd                                                  | 68.87bc              | 17.6de                   |
|           | T2        | 37.3g                           | 53.6e                            | 63.1e                    | 3.24de                                                  | 59.84de              | 16.5e                    |
| DJWJ      | T1        | 96.1cd                          | 69.9bc                           | 91.9c                    | 6.32bc                                                  | 67.40bcd             | 20.0bcd                  |
|           | T2        | 52.5f                           | 63.1d                            | 62.5e                    | 3.85de                                                  | 63.29cde             | 18.7de                   |
| JFX       | T1        | 102.9c                          | 70.7b                            | 87.7cd                   | 6.11bc                                                  | 67.65bcd             | 22.1ab                   |
|           | T2        | 55.9f                           | 46.2f                            | 71.9d                    | 3.21de                                                  | 69.04bc              | 21.7abc                  |
| NSIC      | T1        | 141.0b                          | 66.6cd                           | 91.7c                    | 8.68ab                                                  | 80.12a               | 19.9bcd                  |
|           | T2        | 91.1d                           | 53.7e                            | 96.3bc                   | 5.07cd                                                  | 73.27ab              | 20.0bcd                  |
| LSD(0.05) |           | 6.81                            | 3.87                             | 33.39                    | 2.79                                                    | 8.32                 | 2.69                     |
| T         |           | ***                             | ***                              | ***                      | ***                                                     | ***                  | **                       |
| V         |           | ***                             | ***                              | ***                      | ***                                                     | ***                  | ***                      |
| T*V       |           | ***                             | ***                              | ns                       | ns                                                      | ns                   | ns                       |

T1: control, T2: salt treatment; Different lowercase letters indicate significant level of difference between genotypes under different treatments at  $p < 0.05$ . ns, not significant; \*, \*\* and \*\*\* in the table, indicate  $p < 0.05$ ,  $p < 0.01$  and  $p < 0.001$ , respectively. The 50 plants were harvested to measure grain yield and additional 12 plants to measure yield components in each replicate.

Table S6. Effect of salt stress on grain yield and yield components of different rice genotypes in 2022.

| Variety   | Treatment | Yield<br>(g pot <sup>-1</sup> ) | panicles<br>(pot <sup>-1</sup> ) | Spikelets<br>per panicle | Total spikelets<br>(10 <sup>3</sup> pot <sup>-1</sup> ) | Grain<br>filling (%) | 1000-grain<br>weight (g) |
|-----------|-----------|---------------------------------|----------------------------------|--------------------------|---------------------------------------------------------|----------------------|--------------------------|
| HKN       | T1        | 139.8a                          | 56.5                             | 177.3a                   | 9.98                                                    | 68.18de              | 21.3abc                  |
|           | T2        | 51.1g                           | 38.2                             | 122.9c                   | 4.80                                                    | 58.05f               | 21.1abc                  |
| XD2H      | T1        | 70.1e                           | 52.3                             | 88.1ef                   | 4.73                                                    | 78.24bc              | 21.5abc                  |
|           | T2        | 30.3i                           | 44.9                             | 65.9h                    | 3.08                                                    | 62.28ef              | 18.5de                   |
| HHZ       | T1        | 85.6d                           | 78.6                             | 83.9f                    | 6.66                                                    | 75.61bcd             | 19.2cde                  |
|           | T2        | 39.6h                           | 64.4                             | 60.9h                    | 4.05                                                    | 63.87ef              | 17.6e                    |
| DJWJ      | T1        | 109.2c                          | 85.1                             | 87.7ef                   | 7.56                                                    | 78.78bc              | 20.5bcd                  |
|           | T2        | 57.0f                           | 59.9                             | 75.9g                    | 4.63                                                    | 69.72de              | 20.2bcd                  |
| JFX       | T1        | 120.8b                          | 69.3                             | 100.5d                   | 7.05                                                    | 83.70ab              | 22.8ab                   |
|           | T2        | 61.4f                           | 52.8                             | 77.3g                    | 4.18                                                    | 72.63cd              | 23.2a                    |
| NSIC      | T1        | 127.7a                          | 63.4                             | 139.1b                   | 8.84                                                    | 88.56a               | 22.1ab                   |
|           | T2        | 84.7d                           | 52.2                             | 90.9e                    | 4.87                                                    | 78.57bc              | 20.4bcd                  |
| LSD(0.05) |           | 5.22                            | 5.63                             | 6.19                     | 2.52                                                    | 8.43                 | 2.69                     |
| T         |           | ***                             | ***                              | ***                      | ***                                                     | ***                  | **                       |
| V         |           | ***                             | ***                              | ***                      | ***                                                     | ***                  | ***                      |
| T*V       |           | ***                             | **                               | ***                      | ns                                                      | ns                   | ns                       |

T1: control, T2: salt treatment; Different lowercase letters indicate significant level of difference between genotypes under different treatments at  $p < 0.05$ . ns, not significant; \*, \*\*

and \*\*\* in the table, indicate  $p < 0.05$ ,  $p < 0.01$  and  $p < 0.001$ , respectively. The 50 plants were harvested to measure grain yield and additional 12 plants to measure yield components in each replicate.

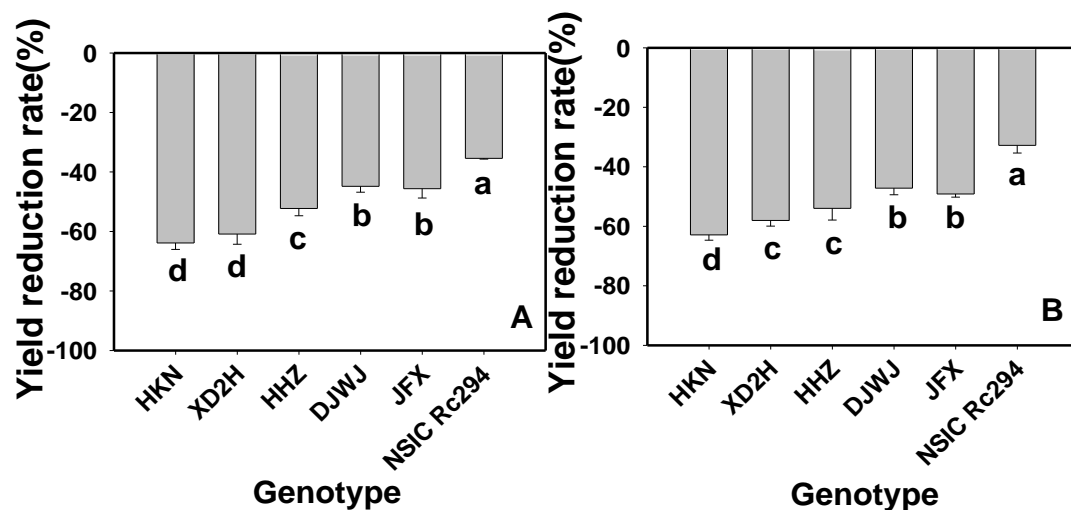

Figure S9. Effect of salt stress on yield reduction rate of different rice genotypes. Different lowercase letters indicate significant difference between genotypes at  $p < 0.05$ . A: 2021. B: 2022.

Table S7. Correlations of yield and yield components with growth and physiological parameters of different rice genotypes under salt stress in 2021.

|                 | Yield      | Panicles              | Spikelets per panicle | Total spikelets       | Grain Filling         | 1000-grain weight     |
|-----------------|------------|-----------------------|-----------------------|-----------------------|-----------------------|-----------------------|
| PH              | 0.4197*    | 0.6906***             | 0.0046 <sup>ns</sup>  | 0.3483*               | 0.2908 <sup>ns</sup>  | 0.292 <sup>ns</sup>   |
| FW              | 0.549***   | 0.789***              | -0.0287 <sup>ns</sup> | 0.497**               | 0.4352**              | 0.1239 <sup>ns</sup>  |
| DW              | 0.4208*    | 0.7799***             | -0.1972 <sup>ns</sup> | 0.5168**              | 0.7627***             | 0.2523 <sup>ns</sup>  |
| TN              | 0.6957***  | 0.5323***             | 0.3392*               | 0.6363***             | 0.4321**              | 0.3549*               |
| SOD             | -0.7034*** | -0.564***             | -0.2678 <sup>ns</sup> | -0.5494***            | -0.3541*              | -0.1536 <sup>ns</sup> |
| POD             | -0.6167*** | -0.4886**             | -0.324 <sup>ns</sup>  | -0.5056**             | -0.3851*              | -0.2052 <sup>ns</sup> |
| CAT             | -0.4163*   | -0.3273 <sup>ns</sup> | -0.3117 <sup>ns</sup> | -0.2883 <sup>ns</sup> | -0.053 <sup>ns</sup>  | -0.1848 <sup>ns</sup> |
| MDA             | -0.6438*** | -0.338*               | -0.3041 <sup>ns</sup> | -0.3517*              | -0.3847*              | -0.2154 <sup>ns</sup> |
| SPT             | -0.3345*   | -0.2256 <sup>ns</sup> | -0.3632*              | -0.3529*              | 0.0505 <sup>ns</sup>  | -0.0569 <sup>ns</sup> |
| Pro             | -0.5512*   | -0.1232 <sup>ns</sup> | -0.4513*              | -0.4943*              | -0.1344 <sup>ns</sup> | -0.1634 <sup>ns</sup> |
| K <sup>+</sup>  | 0.8321***  | 0.7007**              | 0.521*                | 0.7431***             | 0.7545***             | 0.5812**              |
| Na <sup>+</sup> | -0.7533*** | -0.6724***            | -0.491*               | -0.7813***            | -0.6727***            | -0.4422*              |

<sup>ns</sup>, not significant; \*, \*\*, \*\*\* significant at  $p < 0.05$ , 0.01 and 0.001. PH: plant height; FW: fresh weight; DW: dry weight; TN: tiller number; SOD: superoxide dismutase; POD: peroxidase; CAT: catalase; MDA: malondialdehyde; SPT: soluble protein.

Table S8. Correlations of yield and yield components with growth and physiological parameters of different rice genotypes under salt stress in 2022.

|                 | <b>Yield</b>          | <b>Panicles</b>       | <b>Spikelets<br/>per panicle</b> | <b>Total<br/>spikelets</b> | <b>Grain<br/>Filling</b> | <b>1000-grain<br/>weight</b> |
|-----------------|-----------------------|-----------------------|----------------------------------|----------------------------|--------------------------|------------------------------|
| PH              | 0.5285***             | 0.7665***             | -0.0613 <sup>ns</sup>            | 0.3784*                    | 0.6014***                | 0.3461*                      |
| FW              | 0.6838***             | 0.8709***             | 0.1471 <sup>ns</sup>             | 0.5844***                  | 0.6533***                | 0.1516 <sup>ns</sup>         |
| DW              | 0.6175***             | 0.7022***             | 0.1038 <sup>ns</sup>             | 0.5592***                  | 0.9051***                | 0.4896**                     |
| TN              | 0.5443***             | 0.5591***             | 0.3524*                          | 0.6565***                  | 0.5543***                | 0.2859 <sup>ns</sup>         |
| SOD             | -0.5528***            | -0.3988**             | -0.3936*                         | -0.4687**                  | -0.0986 <sup>ns</sup>    | -0.1027 <sup>ns</sup>        |
| POD             | -0.6451***            | -0.3758*              | -0.5312***                       | -0.5867***                 | -0.2165 <sup>ns</sup>    | -0.1737 <sup>ns</sup>        |
| CAT             | -0.6063***            | -0.2973 <sup>ns</sup> | -0.4459**                        | -0.5002**                  | -0.3028 <sup>ns</sup>    | -0.0649 <sup>ns</sup>        |
| MDA             | -0.7097***            | -0.3632*              | -0.3917*                         | -0.4215*                   | -0.5369***               | -0.217 <sup>ns</sup>         |
| SPT             | -0.2897 <sup>ns</sup> | -0.296 <sup>ns</sup>  | -0.2915 <sup>ns</sup>            | -0.3567*                   | 0.0245 <sup>ns</sup>     | 0.0904 <sup>ns</sup>         |
| Pro             | -0.4112*              | -0.1514 <sup>ns</sup> | -0.4923*                         | -0.4763*                   | -0.1814 <sup>ns</sup>    | -0.1314 <sup>ns</sup>        |
| K <sup>+</sup>  | 0.8113***             | 0.6104**              | 0.421*                           | 0.7801***                  | 0.6845***                | 0.5232**                     |
| Na <sup>+</sup> | -0.8342***            | -0.6227***            | -0.423*                          | -0.7524***                 | -0.6347***               | -0.4121*                     |

<sup>ns</sup>, not significant; \*, \*\*, \*\*\* significant at  $p < 0.05$ , 0.01 and 0.001. PH: plant height; FW: fresh weight; DW: dry weight; TN: tiller number; SOD: superoxide dismutase; POD: peroxidase; CAT: catalase; MDA: malondialdehyde; SPT: soluble protein; Pro: proline.
